# Supplementary material
Source: publisher figshare collection journal article supplement (https://future-science-group.figshare.com/ndownloader/files/28562313)
Supplement: Supplementary file 1 [file 28562313]

**Supplementary Table 1: Composition of various batches of tablet**

| **Ingredients** | **Batch 1 (mg)** | **Batch 2 (mg)** | **Batch 3 (mg)** | **Batch 4 (mg)** | **Use of excipient** |
| --- | --- | --- | --- | --- | --- |
| **Dry emulsion** | 500 | 500 | 500 | 500 | - |
| **MCC** | 175 | 154 | 119 | 49 | Diluent |
| **DC2** | 14 | 35 | 70 | 140 | Directly compressible material |
| **Magnesium stearate (0.5%)** | 4 | 4 | 4 | 4 | Glidant |
| **Talc (1%)** | 7 | 7 | 7 | 7 | Glidant |

**Supplementary Table 2: Micromeritics of dry emulsion powder**

| **Sr. No.** | **Properties** | **HPMC E5 + Aerosil 200*** | **HPMC E5** | **Gelatin** |
| --- | --- | --- | --- | --- |
| 1 | Bulk density (gm./cm3) | 0.436 ± 0.008 | 0.404 ± 0.003 | 0.376 ± 0.007 |
| 2 | Tapped density (gm./cm3) | 0.456 ± 0.009 | 0.434 ± 0.007 | 0.427 ± 0.006 |
| 3 | Carr's index | 4.40 ± 0.12 | 11.25 ± 0.027 | 8.41 ± 0.019 |
| 4 | Hausner ratio | 1.046 ± 0.03 | 1.13 ± 0.07 | 1.074 ± 0.04 |
| 5 | Angle repose (θ) | 21.49 ± 0.137 | 28.37 ± 0.247 | 27.73 ± 0.186 |

Mean ± SD (N = 3)

**Supplementary Table 3: Micromeritics properties of the tablet powder blend**

| **Sr. No** | **Properties** | **BATCH 1** | **BATCH 2** | **BATCH 3** | **BATCH 4** |
| --- | --- | --- | --- | --- | --- |
| 1 | Bulk density  (gm/cm3) | 1.06 ± 0.09 | 0.69 ± 0.007 | 0.51 ± 0.005 | 0.49 ± 0.003 |
| 2 | Tapped density (gm/cm3) | 1.15 ± 0.06 | 0.74 ± 0.08 | 0.55 ± 0.007 | 0.52 ± 0.006 |
| 3 | Carr's index | 8.47 ± 0.34 | 8.94 ± 0.17 | 6.52 ± 0.29 | 6.06 ± 0.15 |
| 4 | Hausner ratio | 0.94 ± 0.03 | 0.97 ± 0.02 | 0.92 ± 0.06 | 0.95 ± 0.09 |
| 5 | Angle repose (θ) | 29.73 ± 0.187 | 28.62 ± 0.235 | 26.66 ± 0.128 | 29.06 ± 0.149 |

Mean ± SD (N = 3)
